# Supplementary material for: Synergistic host–guest hydrophobic and hydrogen bonding interactions in the complexation between endo-functionalized molecular tube and strongly hydrophilic guest molecules in aqueous solution
Source: Royal Society of Chemistry journal article supplement (doi:10.1039/c8cp01502c), 2018-01-01
Supplement: c8cp01502c1.pdf [file c8cp01502c1.pdf]

## Supporting Information

# Synergistic Host-Guest Hydrophobic and Hydrogen Bonding Interactions in the Complexation Between Endo-Functionalized Molecular Tube and Strongly Hydrophilic Guest Molecules in Aqueous Solution

Rabindranath Paul and Sandip Paul\*

*Department of Chemistry, Indian Institute of Technology, Guwahati, Assam, India-781039*

(Dated: May 23, 2018)

Here it is worth to mention that the geometry optimization of host-1b molecule was also performed using DFT method in which the same basis set as that for HF method was used (see main article text). It is observed that the configurations adopted by host-1b molecule for these two methods are very similar. Moreover, the orientation of both the  $N - H$  groups of host-1b, as we move from gas phase to solution phase, is changed and this may be attributed due to the presence of solvent water molecules. Furthermore, following previous works<sup>1,2</sup>, we have also calculated the binding free energies for guests dioxane and acetone from the respective estimated PMF values obtained from umbrella sampling method (discussed in the main text). We find that MM-PBSA method gives approximately five times more negative values of binding free energies for both the systems in comparison to that calculated using the PMF values. This is as per our expectation because, MM-PBSA method considers the contributions of all the atomic sites while calculating different interaction energies whereas, we calculated PMF by considering only the center of masses of host and guest molecules. Moreover, MM-PBSA method has some limitations. In brief, in MM-PBSA method, the electrostatic contribution to the solvation free energy is calculated by solving the linearized Poisson-Boltzmann equation and then an empirical term is added for calculating the hydrophobic contributions. Nevertheless, the highly negative binding free energy values obtained from both the methods suggest favorable host-guest interactions.

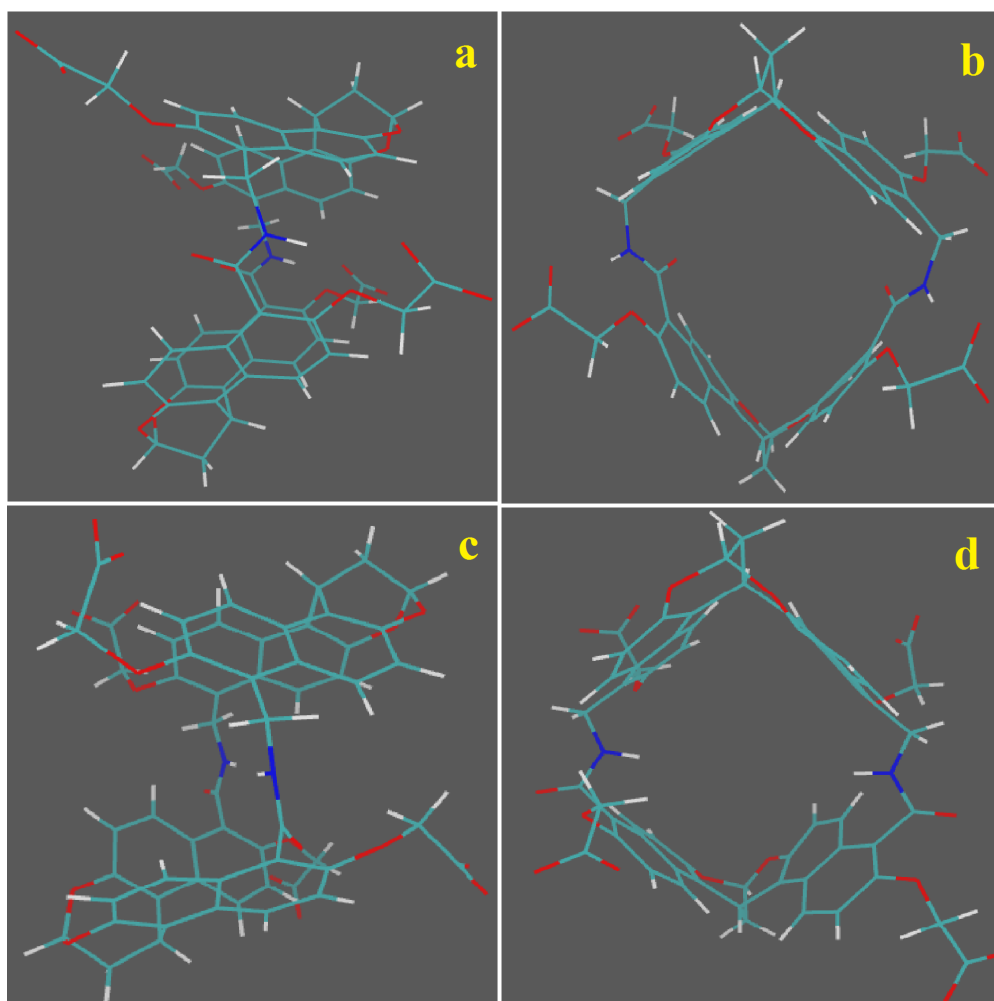

FIG. S1: (a) and (b) are the initial Hartree-Fock optimized configuration in gas phase and (c) and (d) are the configuration after MD run in pure water (without any guest molecules) of the host-1b. Left and right panels represent side and top view, respectively.

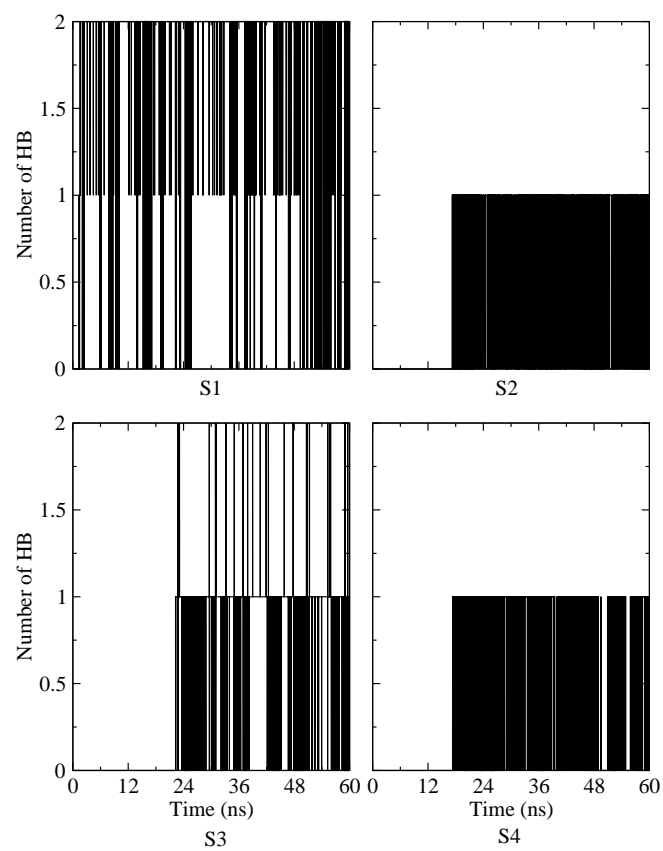

FIG. S2: Host-inserted guest intermolecular hydrogen bonds (HB) value vs. simulation time for different systems.

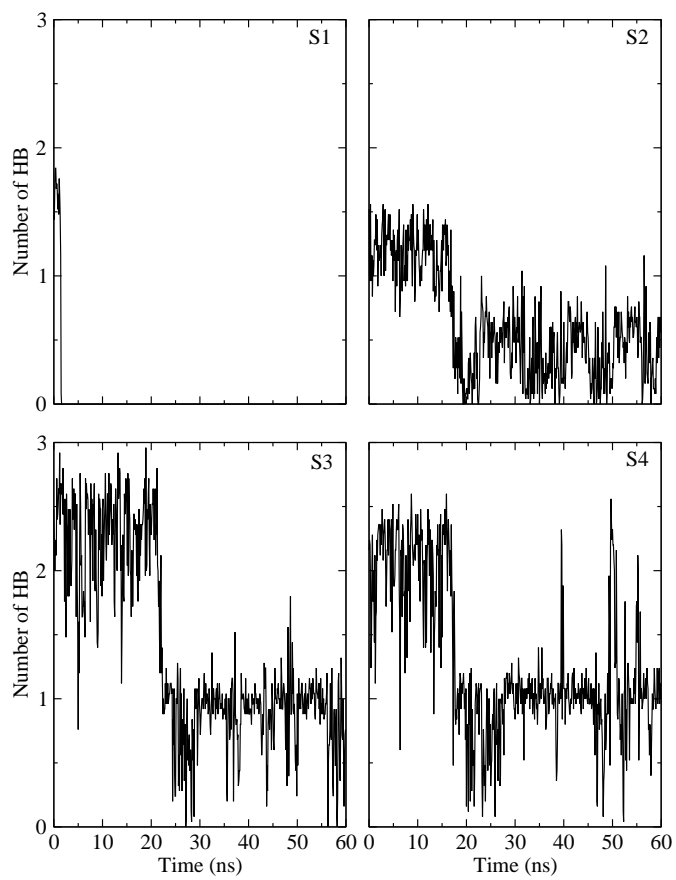

FIG. S3: Water-inserted guest intermolecular hydrogen bonds (HB) as a function of simulation time for different systems.

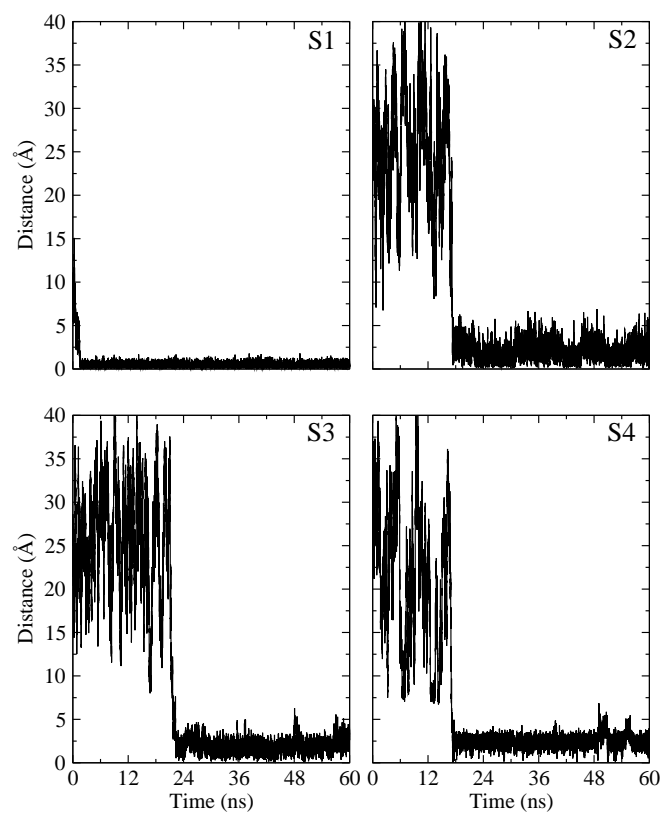

FIG. S4: Host-inserted guest center of mass to center of mass (COM-COM) distance as a function of simulation time for different systems.

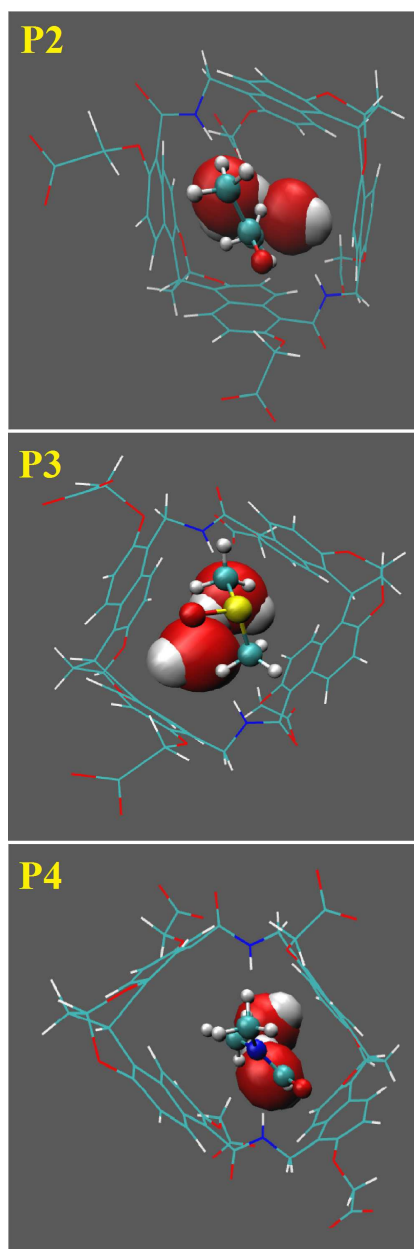

FIG. S5: The visualization of solvent-separated-minimum (SSM) structures for P2, P3 and P4 systems. These snapshots are prepared when the distance between the center-of-mass of host and the center-of-mass of guest is  $5\text{\AA}$ . Only the water molecules (represented as VDW) present between the host-1b (represented as lines) and the guest molecules (represented as CPK) are considered. Other water molecules are left-off to enhance the visual clarity.

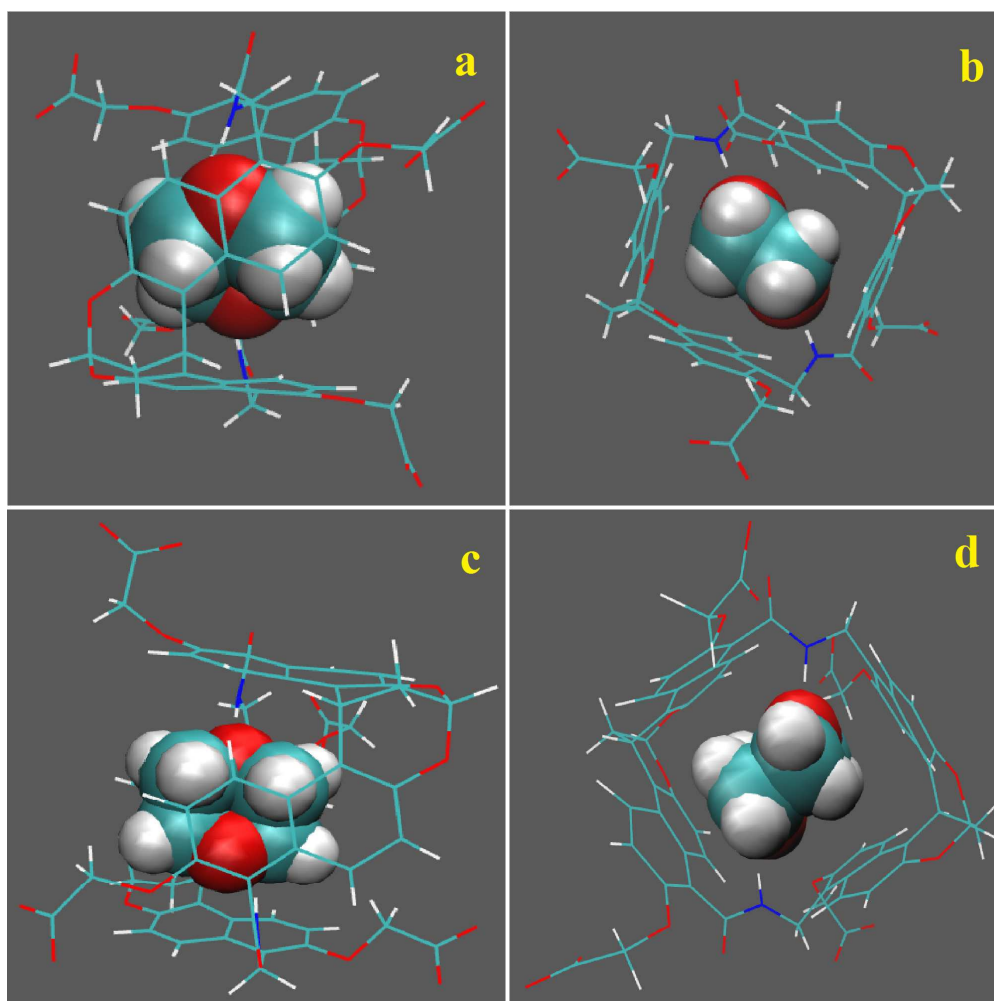

FIG. S6: (a) and (b) are the snapshots for system S1 and (c) and (d) are the snapshots for system S1-test. Left and right panels represent side and top view, respectively.



TABLE S1: Partial charges of different atomic sites of host-1b and ammonium ion.  $e$  is the elementary charge.

| Host-1b      |            |                |            |            |            |            |            |
|--------------|------------|----------------|------------|------------|------------|------------|------------|
| Atom         | Charge (e) | Atom           | Charge (e) | Atom       | Charge (e) | Atom       | Charge (e) |
| O5, O6       | -0.6651    | C85            | -0.6899    | C68        | 0.5877     | H97, H98   | 0.0123     |
| C20          | 0.5716     | C84            | 0.5877     | C66        | -0.6117    | H81        | 0.1708     |
| C13          | 1.0925     | C82            | -0.6117    | C65        | -0.2608    | O101, O102 | -0.5940    |
| C99, C100    | -0.6651    | C80            | -0.2608    | H103       | 0.1708     | H14        | -0.0695    |
| C36          | 0.5716     | C79            | 0.4658     | H67        | 0.3942     | C15        | -1.0468    |
| C37          | -0.3272    | O9, O10        | -0.5802    | H59        | 0.1657     | H16, H17   | 0.1888     |
| H38          | 0.1814     | C72            | 0.8542     | H61, H90   | 0.1740     | H54, H55   | 0.0123     |
| C39          | -0.2464    | C29            | -0.2464    | C77        | 0.9714     | C18        | 1.0382     |
| H40          | 0.1632     | C64            | 0.4658     | C74        | -0.7070    | H19        | -0.1261    |
| C41          | 0.2421     | C63            | -0.4062    | H75, H76   | 0.0996     | C21, C49   | -0.5908    |
| C42          | -0.6232    | C62            | -0.0491    | H32        | 0.1814     | C22        | 0.1891     |
| C43          | 0.4809     | C60            | -0.2565    | H78        | -0.1762    | C23        | -0.2887    |
| O7, O8       | -0.1990    | C58            | -0.2864    | C92        | -0.4062    | H24        | 0.1635     |
| C50          | -0.2490    | C57            | 0.5118     | C91        | -0.0491    | C25        | -0.2642    |
| H51, H52     | 0.0636     | O11, O12       | -0.3156    | C89        | -0.2565    | H104       | 0.1653     |
| C96          | 0.5277     | C69            | 0.0133     | C87        | -0.2864    | C26        | 0.4809     |
| C111         | 1.1483     | H70, H71       | -0.0031    | C86        | 0.5118     | H2         | 0.5133     |
| O114, O116   | -0.9397    | H83            | 0.3942     | H88        | 0.1657     | C33        | -0.2490    |
| N1, N3       | -1.1261    | C112           | 1.0887     | C93        | 0.0133     | H34, H35   | 0.0636     |
| C44          | -0.2642    | O113, O115     | -0.9441    | H94, H95   | -0.0031    | H4         | 0.5133     |
| H45          | 0.1653     | H73            | -0.0469    | C31        | -0.3272    | C105       | 1.1483     |
| C46          | -0.2887    | C56            | -0.6899    | C106       | 1.0887     | O107       | -0.9397    |
| H47          | 0.1635     | C53            | 0.5277     | O108, O110 | -0.9441    | O109       | -0.9397    |
| C48          | 0.1891     | H30            | 0.1632     | C28        | 0.2421     | C27        | -0.6232    |
| Ammonium ion |            |                |            |            |            |            |            |
| N1           | -0.8762    | H2, H3, H4, H5 | 0.4691     |            |            |            |            |

TABLE S2: Average number of host-water hydrogen bonds for different systems. For calculating host-water hydrogen bonds the N1 and N3 atomic sites (as well as hydrogen atoms attached to them) of host-1b are considered.

| Average value of hydrogen bonds |         |         |
|---------------------------------|---------|---------|
| System                          | N1 atom | N3 atom |
| S0                              | 0.85    | 0.67    |
| S1                              | 0.02    | 0.01    |
| S2                              | 0.42    | 0.31    |
| S3                              | 0.71    | 0.51    |
| S4                              | 0.32    | 0.23    |

TABLE S3: Average number of host-inserted guest hydrogen bonds for different systems.

| System | Average value of hydrogen bonds |
|--------|---------------------------------|
| S1     | 1.91                            |
| S2     | 0.57                            |
| S3     | 0.57                            |
| S4     | 0.58                            |

TABLE S4: Average internal diameter-1 and internal diameter-2 of host-1b for S1 and S1-test system.

| System  | Average value of diameter-1 ( $\text{\AA}$ ) | Average value of diameter-2 ( $\text{\AA}$ ) |
|---------|----------------------------------------------|----------------------------------------------|
| S1      | 13.04                                        | 9.80                                         |
| S1-test | 13.07                                        | 9.79                                         |

TABLE S5: The binding free energy values of S1 and S1-test system. All energy values are expressed in kcal/mol unit.

| System  | $\Delta E_{vdw}$ | $\Delta E_{ele}$ | $\Delta G_{PB}$ | $\Delta G_{NP}$ | $\Delta G_{bind}^0$ |
|---------|------------------|------------------|-----------------|-----------------|---------------------|
| S1      | -27.98           | -10.17           | 12.43           | -19.15          | -44.87              |
| S1-test | -27.99           | -10.12           | 12.46           | -19.10          | -44.75              |

\* Electronic address: [sandipp@iitg.ernet.in](mailto:sandipp@iitg.ernet.in)

#### References:

- <sup>1</sup> J. Timko, D. Bucher, S. Kuyucak, *J. Chem. Phys.*, 2010, **132**, 114510-1-8.
- <sup>2</sup> J. S. Patel, F. M. Ytreberg, *J. Chem. Theory Comput.*, 2018, **14**, 991-997.
